# Supplementary material for: Controlling magnetism via transition metal exchange in the series of intermetallics Eu(T1,T2)5In (T = Cu, Ag, Au)
Source: Royal Society of Chemistry journal article supplement (doi:10.1039/c7tc04964a), 2017-11-24
Supplement: c7tc04964a1.pdf [file c7tc04964a1.pdf]

## Controlling Magnetism via Transition Metal Exchange in the Series of Intermetallics $\text{Eu}(T1,T2)_5\text{In}$ ( $T = \text{Cu}, \text{Ag}, \text{Au}$ )

Volodymyr Smetana,<sup>a</sup> Yaroslav Mudryk,<sup>b</sup> Vitalij K. Pecharsky,<sup>b,c</sup> Anja-Verena Mudring\*,<sup>a</sup>

<sup>a</sup> Department of Materials and Environmental Chemistry, Stockholm University, Svante Arrhenius väg 16 C, 106 91 Stockholm, Sweden

<sup>b</sup> Ames Laboratory, U.S. Department of Energy, Iowa State University, Ames, Iowa 50011-3020, USA

<sup>c</sup> Department of Materials Science and Engineering, Iowa State University, Ames, Iowa 50011-2300, USA

### Electronic Supplementary Information

**Table S1.** Critical Field ( $H_{\text{cr}}$ ) at 2 K of the metamagnetic-like transformations in  $\text{EuAu}_x\text{Cu}_{5-x}\text{In}$  alloys as a function of  $x(\text{Au})$

| $x(\text{Au})$ | $H_{\text{cr}}$ , kOe |
|----------------|-----------------------|
| 2.66           | 36                    |
| 3.03           | 30                    |
| 3.94           | 16                    |
| 4.61           | 0                     |
